# Supplementary material for: Extreme Recombination Frequencies Shape Genome Variation and Evolution in the Honeybee, Apis mellifera
Source: PLoS Genet. 2015 Apr 22;11(4):e1005189. doi: 10.1371/journal.pgen.1005189 (PMC4406589; doi:10.1371/journal.pgen.1005189)
Supplement: S2 Table — (XLSX) [file pgen.1005189.s012.xlsx]

## Sheet: Sheet1
A. All mutations
Recombination rate	GC	Skewness	p-value	B	CIinfB	CIsupB	lambda	CIinflambda	CIsuplambda	eNeutral	eWS	eSW	lnL0	lnL1	lnLmax		Recombination rate	Average local recombination rate (1000bp around SNPs) in rho/kb
25	0.31	-0.0481621	0.017942	0.0121808	-0.335485	0.273742	12.399	11.603	13.3739	0.00646652	0.080373	0.08116	-535.799	-535.795	-441.55		GC	Average local GC content (100bp around SNPs)
50	0.323	-0.0535002	0.0362869	1.12875	0.787089	1.49487	11.5782	10.5525	12.7235	0.0107264	0.144687	0.0710639	-473.97	-457.899	-387.916		Skewness	Skewness of the folded GC frequency spectrum
75	0.328	-0.0535732	0.0639761	1.18166	0.569728	1.68655	11.1127	10.0525	11.8364	0.00477241	0.12075	0.0647313	-454.908	-442.779	-362.175		p-value	p-value of the skewness being different from 0
100	0.335	-0.0552195	0.0415483	2.42654	1.66375	3.00881	11.1314	10.2753	12.0582	0.0203257	0.21697	0.0640354	-488.558	-439.58	-375.273		B	Estimated B = 4Neb
125	0.333	-0.0554753	0.0346282	2.1282	1.71008	2.88008	10.8078	10.1415	11.4919	0.00897658	0.135907	0.0576714	-525.453	-471.163	-372.869		CIinfB	Lower bound of the 95% confidence interval for B obtained through 100 bootstraps
150	0.335	-0.0551469	0.0196275	2.33327	1.86963	2.77529	10.5655	9.93855	11.093	0.00465767	0.125899	0.0622253	-597.033	-503.767	-400.3		CIsupB	Upper bound of the 95% confidence interval for B obtained through 100 bootstraps
175	0.338	-0.0567116	0.0110412	2.55743	2.09033	3.04416	10.4694	9.83018	10.9589	0.0120294	0.110942	0.0599019	-648.118	-532.98	-405.855		lambda	Estimated GC->AT mutation bias
200	0.344	-0.0564756	0.00561567	2.58983	2.16724	3.08545	9.70583	9.30813	10.2158	0.0104718	0.115681	0.0481168	-758.959	-600.005	-427.578		Ciinflambda	Lower bound of the 95% confidence interval for lambda obtained through 100 bootstraps
225	0.343	-0.0562569	0.000547431	2.58478	2.32006	2.84974	10.6293	10.1569	10.9732	0.0151264	0.104372	0.0571922	-893.519	-651.27	-465.191		Cisuplambda	Upper bound of the 95% confidence interval for lambda obtained through 100 bootstraps
250	0.357	-0.0568872	0.000341053	2.74936	2.51387	3.07713	10.269	9.941	10.616	0.0102645	0.0978142	0.0520607	-976.621	-680.623	-470.454		eNeutral	Estimated polarization error rates for the WW+SS spectrum
275	0.353	-0.0567081	3.18827e-05	3.05092	2.7778	3.47061	10.0099	9.70906	10.2912	0.0152668	0.112857	0.053288	-1319.77	-855.617	-496.166		eWS	Estimated polarization error rates for the WS spectrum
300	0.36	-0.0569827	6.02e-06	3.07916	2.81246	3.42614	9.38321	9.07623	9.68122	0.0117377	0.113779	0.0506798	-1499.34	-931.957	-511.257		eSW	Estimated polarization error rates for the SW spectrum
325	0.36	-0.0569746	1.15e-06	3.34165	2.9374	6.15532	9.21161	8.96539	10.051	0.0140237	0.123054	0.0512493	-1764.52	-1026.65	-526.764		lnL0	log-likelihood of the null model (Without gBGC, B = 0)
350	0.366	-0.0573079	2.39e-07	5.26404	3.18016	6.05523	9.68272	9.01235	10.0562	0.0339619	0.182312	0.0480888	-1891.17	-1058.69	-534.255		lnL1	log-likelihood of gBGC model
375	0.372	-0.0575218	1.61e-08	5.98337	3.0165	6.59646	9.93761	9.08233	10.3285	0.0378551	0.19652	0.0473083	-2169.21	-1206.35	-549.935		lnLmax	log-likelihood of the saturated model
400	0.372	-0.057757	1.08e-09	6.06082	3.279	6.73339	9.75183	8.85802	10.1003	0.0382152	0.196926	0.0484288	-2508.74	-1348.85	-561.356
425	0.376	-0.0571254	5.16e-11	3.61576	3.24546	6.17117	9.19331	8.97567	10.0101	0.0173018	0.129977	0.0515981	-2819.75	-1478.42	-576.268
450	0.378	-0.0578017	1.49e-11	6.29725	3.76006	6.98709	9.86512	9.05888	10.1901	0.0405337	0.194411	0.0457596	-3118.54	-1525.13	-579.952
475	0.382	-0.0574761	5.49e-11	6.43656	3.48765	6.89999	9.71605	8.85085	10.0492	0.0295402	0.199614	0.0419872	-2990.33	-1447.89	-576.978
500	0.381	-0.0576828	5.09e-12	6.87703	6.28748	7.20072	9.92159	9.57493	10.1317	0.0411127	0.199066	0.045035	-3368.11	-1649.09	-585.053
525	0.383	-0.0575151	1.32e-10	6.75965	6.08726	7.1799	9.93427	9.53099	10.1984	0.0373219	0.199996	0.0438426	-2953.3	-1428.74	-571.302
550	0.384	-0.057848	1.86e-11	6.58822	4.11046	7.2287	9.78533	8.9114	10.1814	0.0337604	0.200594	0.0452009	-3027.9	-1460.98	-578.527
575	0.39	-0.0580381	3.2e-11	6.87909	6.43849	7.41725	9.75908	9.50117	10.045	0.0406495	0.200914	0.0435801	-3059.77	-1430.87	-574.563
600	0.387	-0.0574773	1.54e-10	6.7025	6.01532	7.11897	9.93998	9.52455	10.2138	0.0400184	0.196108	0.0436275	-2971.56	-1372.77	-570.731
625	0.389	-0.0574485	8.72e-10	6.99401	6.5435	7.41155	9.78902	9.52336	10.095	0.0562728	0.197392	0.0439406	-2822.53	-1344.47	-564.429
650	0.388	-0.0569027	5.71e-09	6.02959	3.286	6.71576	9.42625	8.53923	9.85461	0.0322127	0.196268	0.0410927	-2462	-1280.82	-557.602
675	0.388	-0.0564108	1.99e-07	6.38102	5.72394	6.88593	9.43518	9.0437	9.7873	0.0355379	0.201294	0.0428143	-2141.95	-1138.49	-540.431
700	0.386	-0.0567399	1.19e-06	6.36307	3.3153	6.85253	9.66824	8.82087	10.0033	0.0440358	0.199622	0.0404285	-1877.58	-1055.82	-527.545
725	0.385	-0.0565126	0.000901963	6.1403	2.97443	6.95494	9.36465	8.37623	9.85057	0.0401143	0.201651	0.041031	-1077.46	-697.432	-457.573
750	0.39	-0.0563121	0.00202076	6.50292	3.3068	7.18803	9.82194	8.67967	10.4136	0.0303689	0.207045	0.0445247	-1041.94	-679.952	-444.48
775	0.397	-0.0566354	0.0244623	5.68904	3.40468	6.79635	8.75099	7.81948	9.3856	0.0442404	0.190219	0.0398405	-712.677	-509.134	-386.924
800	0.386	-0.0557016	0.0980763	3.14715	2.41433	5.1309	8.53203	7.83323	9.3651	0.00164116	0.115176	0.0500732	-506.399	-423.845	-329.556
825	0.364	-0.0539052	0.240143	2.75416	2.01288	6.37198	7.90879	7.20588	9.00776	1.07e-11	0.101263	0.0371762	-404.211	-365.386	-282.546
850	0.399	-0.0547974	0.384837	3.18556	1.79812	9.04514	8.67617	7.77992	12.1685	0.0123486	0.135224	0.0642294	-285.951	-267.348	-206.201
875	0.42	-0.0556785	0.72584	5.75001	-0.815293	13.9554	9.75903	7.09244	16.5167	5.86e-13	0.225302	0.0495832	-123.144	-118.66	-80.4037
B. Transitions
Recombination rate	GC	Skewness	p-value	B	CIinfB	CIsupB	lambda	CIinflambda	CIsuplambda	eNeutral	eWS	eSW	lnL0	lnL1	lnLmax
25	0.31	-0.0482599	0.0207114	0.04919	-0.27996	0.270217	14.15	13.1484	15.1697	0.0061047	0.0941588	0.0842065	-535.386	-535.331	-437.988
50	0.323	-0.0529598	0.0429411	1.30072	0.737882	1.71158	12.7326	11.611	13.8308	0.0106175	0.17526	0.0730603	-478.866	-460.15	-384.538
75	0.328	-0.0532026	0.0727986	1.19498	0.612008	1.7483	12.0834	10.957	13.2096	0.00466732	0.134473	0.0683249	-449.839	-439.093	-358.464
100	0.335	-0.0540878	0.0515006	2.64534	1.95004	3.0002	12.4515	11.4857	13.6113	0.0204675	0.25	0.0676167	-483.793	-434.129	-371.669
125	0.333	-0.0549072	0.0411221	2.21448	1.60976	2.90255	11.9232	11.1066	12.7278	0.0081525	0.146396	0.0598035	-520.46	-467.026	-369.219
150	0.335	-0.0544326	0.0245101	2.53667	2.04081	3.04804	11.5552	10.7011	12.1863	0.00420785	0.144841	0.0647375	-599.396	-501.435	-397.251
175	0.338	-0.0560604	0.0141575	2.74133	2.24238	3.59656	11.431	10.8748	11.9933	0.0118477	0.128087	0.0618726	-650.279	-533.874	-402.32
200	0.344	-0.0559402	0.00740131	2.76427	2.38175	5.35639	10.5898	10.0475	11.3048	0.00980824	0.127629	0.0502317	-757.383	-592.258	-424.558
225	0.343	-0.055337	0.000897733	2.77477	2.45829	3.13933	11.7007	11.2631	12.0829	0.0139965	0.116478	0.0586605	-911.039	-655.24	-462.136
250	0.357	-0.05615	0.000555729	2.93115	2.66296	3.2212	11.2119	10.7533	11.6184	0.00989137	0.111026	0.0540584	-980.763	-677.449	-466.762
275	0.353	-0.0560172	5.98638e-05	3.32407	2.96831	6.27573	10.8526	10.5606	11.9569	0.0153304	0.130957	0.0554302	-1340.61	-863.702	-492.862
300	0.36	-0.0563639	1.25676e-05	3.4073	3.12982	6.1165	10.2982	9.96602	11.1622	0.0117805	0.134379	0.0526809	-1530.01	-935.437	-507.621
325	0.36	-0.0565349	2.54e-06	5.51859	3.20397	6.56157	10.5441	9.78252	11.1906	0.0252062	0.200554	0.0514296	-1754.56	-1004.35	-523.152
350	0.366	-0.0566925	6.27e-07	6.36921	3.9948	6.95218	10.9582	10.1041	11.2414	0.0364762	0.208238	0.0495863	-1940.46	-1038.26	-530.723
375	0.372	-0.0569138	4.79e-08	6.68658	3.7262	7.11488	11.009	9.94779	11.3266	0.0388701	0.212736	0.0489498	-2211.34	-1151.94	-546.51
400	0.372	-0.0571421	3.96e-09	6.79686	3.59353	7.38426	10.8929	5.69626	11.1565	0.0385001	0.213017	0.0498324	-2563.21	-1318.76	-557.778
425	0.376	-0.0563251	2.62e-10	6.25778	3.9831	6.78949	10.8599	10.047	11.194	0.0288943	0.205893	0.0511333	-2914.44	-1455.54	-572.844
450	0.378	-0.0571241	7.74e-11	6.88179	6.21386	7.33646	10.9347	10.5635	11.2075	0.0403821	0.205178	0.0476392	-3198.19	-1444.03	-576.217
475	0.382	-0.0568149	2.5e-10	7.08692	6.33138	7.49178	10.7406	10.2862	11.0236	0.0294703	0.212984	0.0434695	-3053.24	-1399.54	-573.553
500	0.381	-0.0569943	2.83e-11	7.47909	7.02502	7.7979	10.9842	10.6052	11.2572	0.0405606	0.212101	0.0468762	-3457.97	-1593.44	-581.7
525	0.383	-0.0567136	6.36e-10	7.3485	6.93485	7.71224	11.0407	10.6271	11.2875	0.0364395	0.211597	0.0454272	-3048.1	-1362.14	-567.819
550	0.384	-0.0572365	8.98e-11	7.18975	6.76566	7.54954	10.7813	10.4937	11.0161	0.0331977	0.210612	0.0466205	-3135.03	-1393.99	-574.825
575	0.39	-0.0572329	1.71e-10	7.52046	7.03878	7.86003	10.8327	10.4731	11.1329	0.0402381	0.213084	0.0454162	-3159.39	-1369.21	-571.091
600	0.387	-0.0567819	6.81e-10	7.33632	6.79889	7.78926	10.9681	10.5676	11.2956	0.0397621	0.207792	0.0453517	-3072.94	-1316.06	-567.155
625	0.389	-0.0568903	3.15e-09	7.52405	7.01456	7.90141	10.7699	10.4064	11.0709	0.0555818	0.208582	0.0457661	-2878.74	-1271.3	-560.731
650	0.388	-0.0562265	1.92e-08	6.80592	6.03534	7.27821	10.5537	10.002	10.824	0.032884	0.212619	0.0423368	-2545.43	-1226.58	-553.961
675	0.388	-0.0558032	5.05e-07	6.88887	6.31887	7.34196	10.3782	10.0533	10.7508	0.0352681	0.213154	0.0448266	-2188.42	-1108.2	-536.928
700	0.386	-0.0561625	2.72e-06	6.93216	6.02399	7.43434	10.6952	10.265	11.0633	0.0437214	0.211657	0.0420316	-1912.13	-1012.09	-523.819
725	0.385	-0.0558244	0.00138603	6.84555	5.49385	7.6045	10.4853	9.88604	11.1086	0.0401575	0.215885	0.0426861	-1111.5	-681.941	-454.124
750	0.39	-0.0558691	0.00276214	6.8854	5.2733	7.31245	10.5322	9.68979	11.2373	0.0297232	0.214635	0.0460544	-1050.15	-665.8	-441.001
775	0.397	-0.0561375	0.0295999	6.15538	4.4768	7.30977	9.64342	8.72638	10.4139	0.0435294	0.207337	0.0417613	-711.054	-503.104	-383.348
800	0.386	-0.0547913	0.113108	3.48196	2.6354	6.30818	9.41957	8.48166	10.5032	0.00254201	0.135239	0.0519107	-505.651	-417.077	-326.783
825	0.364	-0.0539957	0.250111	3.14614	2.28385	6.90401	8.6317	7.77086	10.1314	8.23e-11	0.123054	0.0384585	-405.363	-362.921	-278.83
850	0.399	-0.0532386	0.40772	3.25638	1.62552	9.50792	9.77532	8.73538	12.8585	0.0144934	0.123617	0.0670881	-285.103	-264.585	-204.102
875	0.42	-0.0537194	0.741637	5.81103	1.28291	12.223	10.5348	6.92164	19.1204	9.2e-13	0.246373	0.0539577	-123.004	-118.438	-78.6419
C. Transversion
Recombination rate	GC	Skewness	p-value	B	CIinfB	CIsupB	lambda	CIinflambda	CIsuplambda	eNeutral	eWS	eSW	lnL0	lnL1	lnLmax
25	0.31	-0.00738873	0.936029	-0.274146	-1.30568	0.394799	2.59013	2.13862	3.07991	0.0115659	0.00564412	3.68e-10	-320.273	-319.927	-246.183
50	0.323	-0.0128698	0.913645	-0.954796	-2.58403	0.105188	2.61172	2.03155	3.16273	0.019513	5.86e-13	0.0369291	-259.849	-258.519	-192.067
75	0.328	-0.0285209	0.826836	3.38602	-0.69402	4.97142	3.64703	2.61877	4.32068	0.0271833	0.13506	5.86e-13	-242.284	-236.557	-172.53
100	0.335	-0.00962066	0.937467	0.197422	-1.08766	2.37206	2.34555	1.80491	2.97963	0.0252851	0.0289134	1.37e-10	-250.783	-250.735	-182.043
125	0.333	-0.0143893	0.90601	0.0921726	-1.43023	1.36984	2.58323	2.01518	3.10453	0.0288122	0.023101	0.0123993	-236.036	-236.026	-184.672
150	0.335	-0.0173032	0.874243	-0.11759	-1.25414	1.09457	2.6622	2.17647	3.33693	0.0086757	5.16e-11	5.29e-11	-265.595	-265.549	-204.217
175	0.338	-0.0182262	0.859983	0.123636	-0.522862	1.02201	2.67913	2.14237	3.25562	0.0286568	5.86e-13	0.0272575	-269.137	-269.101	-216.197
200	0.344	-0.0169408	0.857088	0.128562	-0.851918	1.14777	2.57395	2.01046	3.04622	0.0249986	0.0311367	3.59e-10	-298.828	-298.8	-229.883
225	0.343	-0.0164921	0.827702	-0.301093	-2.01426	0.848676	2.48665	2.12582	2.87701	0.0332988	0.0199156	0.0224167	-338.52	-338.296	-272.57
250	0.357	-0.0216993	0.767987	0.361447	-0.217646	1.02499	2.68161	2.19415	3.01685	0.0194893	0.00689786	0.00405532	-353.285	-352.73	-288.704
275	0.353	-0.02414	0.703924	0.32444	-0.236505	0.9764	2.78257	2.38019	3.19785	0.0230777	0.00265763	0.000738314	-370.211	-369.614	-308.51
300	0.36	-0.0152046	0.790932	0.0659894	-0.549328	0.542922	2.3224	2.02131	2.60385	0.019585	5.86e-13	0.000223996	-397.388	-397.347	-331.615
325	0.36	-0.0228359	0.664084	0.31795	-0.0668347	0.728939	2.70577	2.44282	3.01796	0.0205467	0.0137445	3.53e-11	-430.902	-429.889	-346.72
350	0.366	-0.0253341	0.610752	0.0683231	-0.388977	0.518595	2.67461	2.40045	2.92537	0.0331266	0.0106098	9.67e-11	-424.234	-424.192	-351.092
375	0.372	-0.0269716	0.56808	0.327459	-0.0618985	0.605343	2.74032	2.49363	3.05271	0.02386	5.9e-13	0.00241898	-457.21	-455.734	-370.925
400	0.372	-0.0212652	0.62249	0.271405	-0.287568	0.785129	2.44006	2.24797	2.62893	0.0326286	0.0366174	0.00828903	-458.686	-458.053	-385.685
425	0.376	-0.0240216	0.549001	-0.0883502	-0.564575	0.235769	2.51549	2.32344	2.69433	0.0213632	0.0197744	0.00753521	-476.292	-476.2	-396.822
450	0.378	-0.0247373	0.524415	-0.163669	-0.546607	0.29454	2.58246	2.40973	2.80615	0.0271453	0.00940789	0.00470003	-498.601	-498.221	-403.625
475	0.382	-0.0285837	0.479013	0.449963	0.00939198	0.760017	2.68833	2.46626	2.85842	0.0186513	0.0260835	0.0020759	-492.36	-489.77	-398.849
500	0.381	-0.025874	0.497974	0.252715	-0.187455	0.575272	2.54826	2.35567	2.70019	0.0272205	0.0148707	0.000823563	-495.637	-494.783	-405.626
525	0.383	-0.0229951	0.573843	-0.358915	-0.766535	-0.0639059	2.38311	2.1844	2.5491	0.0290726	0.0110515	0.00684247	-469.969	-468.598	-391.077
550	0.384	-0.0293243	0.454281	-0.302379	-0.873533	0.211234	2.69802	2.42194	2.89896	0.0262778	0.0122121	0.0111091	-469.726	-468.623	-404.256
575	0.39	-0.027741	0.486302	-0.0285451	-0.608079	0.352514	2.51908	2.32933	2.73283	0.0327685	0.0159643	0.00560375	-497.72	-497.711	-394.264
600	0.387	-0.0310047	0.448717	-0.0185188	-0.365873	0.281279	2.76671	2.51652	2.99731	0.0278799	5.38e-11	0.00401338	-456.73	-456.724	-391.835
625	0.389	-0.0273283	0.522215	0.19461	-0.147798	0.53401	2.59809	2.41257	2.83392	0.0374138	4.21e-10	0.00285726	-469.77	-469.167	-386.212
650	0.388	-0.0209424	0.642667	-0.310374	-0.669242	0.0971087	2.30403	2.12492	2.52707	0.0215912	1.1e-09	0.00890268	-457.691	-456.513	-377.867
675	0.388	-0.0249808	0.62022	0.0620796	-0.368909	0.470577	2.47451	2.18277	2.68559	0.0199089	0.00108616	5.86e-13	-430.308	-430.262	-362.235
700	0.386	-0.0238773	0.65509	-0.0362708	-0.47949	0.321305	2.49022	2.18598	2.69073	0.029495	0.0067321	0.00685135	-423.149	-423.139	-349.925
725	0.385	-0.0224979	0.769375	-0.236654	-1.01633	0.535371	2.34423	2.02864	2.76579	0.0281987	0.0126568	0.000985699	-337.873	-337.662	-270.697
750	0.39	-0.0388524	0.650482	0.387015	-0.369334	1.03135	3.33495	2.83528	3.9473	0.0140688	0.004707	0.00673064	-333.465	-332.944	-251.182
775	0.397	-0.0222173	0.845593	0.369542	-0.625699	1.64777	2.27107	1.78184	2.82456	0.0381106	0.000625139	7.96e-13	-256.21	-255.902	-196.286
800	0.386	-0.0213001	0.884723	0.237005	-1.42141	1.52745	2.31961	1.66643	2.97339	1.44e-11	1.66e-12	0.0174748	-207.592	-207.533	-144.66
825	0.364	0.00281952	0.989529	-0.854597	-2.60047	0.364767	1.75101	1.14383	2.67483	1.07e-12	2.48e-12	1.59e-12	-168.352	-167.542	-112.31
850	0.399	0.0146269	0.962813	-2	-19.9176	3.44644	1.42358	0.465958	2.01591	5.29e-10	5.86e-13	0.0159552	-87.8284	-87.7538	-66.0563
875	0.42	-0.0548677	0.931392	2.94347	-0.2113	30.091	4.00836	0.794132	39.245	7.81e-13	4.16e-12	1.89e-12	-31.1843	-30.9041	-21.8996
